# Supplementary material for: Association between fluid-attenuated inversion recovery vascular hyperintensity and outcome varies with different lesion patterns in patients with intravenous thrombolysis
Source: HighWire-hosted journal article supplement (doi:10.1136/svn-2020-000641), 2021-02-16
Supplement: svn-2020-000641supp001_data_supplement.pdf [file svn-2020-000641supp001_data_supplement.pdf]

Table 4. The association between FVH location and outcome.

|              | FVH within<br>DWI lesion | FVH beyond<br>DWI lesion | FVH (both within<br>and beyond) | P value |
|--------------|--------------------------|--------------------------|---------------------------------|---------|
| mRS < 3, (%) | 6 (11.3)                 | 42 (79.2)                | 5 (9.4)                         | 0.319   |
| mRS ≥3, (%)  | 8 (17.0)                 | 31 (66.0)                | 8 (17.0)                        |         |

Table 5. Results of multiple logistic analysis for poor outcome in FVH (+) patients.

|                        | OR (95%CI)       | P value          |
|------------------------|------------------|------------------|
| Age                    | 0.99 (0.95-1.04) | 0.737            |
| Male                   | 1.83 (0.44-7.64) | 0.406            |
| FVH within DWI lesion  |                  | 0.896            |
| beyond DWI lesion      | 1.07 (0.25-4.63) | 0.924            |
| both within and beyond | 1.51(0.22-10.39) | 0.678            |
| Occlusion              | 5.67(1.99-16.13) | <b>0.001</b>     |
| NIHSS at admission     | 1.29(1.13-1.46)  | <b>&lt;0.001</b> |
